# Supplementary material for: Exploring piezoelectric and piezophototronic properties of nanostructured LN-ZnSnS3 for photoresponsive vibrational energy harvesting
Source: Royal Society of Chemistry journal article supplement (doi:10.1039/d4nr05246c), 2025-01-01
Supplement: d4nr05246c1.pdf [file d4nr05246c1.pdf]

## Supporting Information

### Exploring Piezoelectric and Piezophototronic Properties of Nanostructured LN-ZnSnS<sub>3</sub> for Photo Responsive Vibrational Energy Harvesting

Surajit Das<sup>a,#</sup> Swadesh Paul<sup>a,#</sup> and Anuja Datta<sup>\*a, b</sup>

<sup>a</sup>School of Applied and Interdisciplinary Sciences; <sup>b</sup>Technical Research Centre; Indian Association for the Cultivation of Science, 2A and 2B Raja S. C. Mullick Road, Kolkata, India-700032

\*E-mail: [psuad4@iacs.res.in](mailto:psuad4@iacs.res.in); #Equally contributing

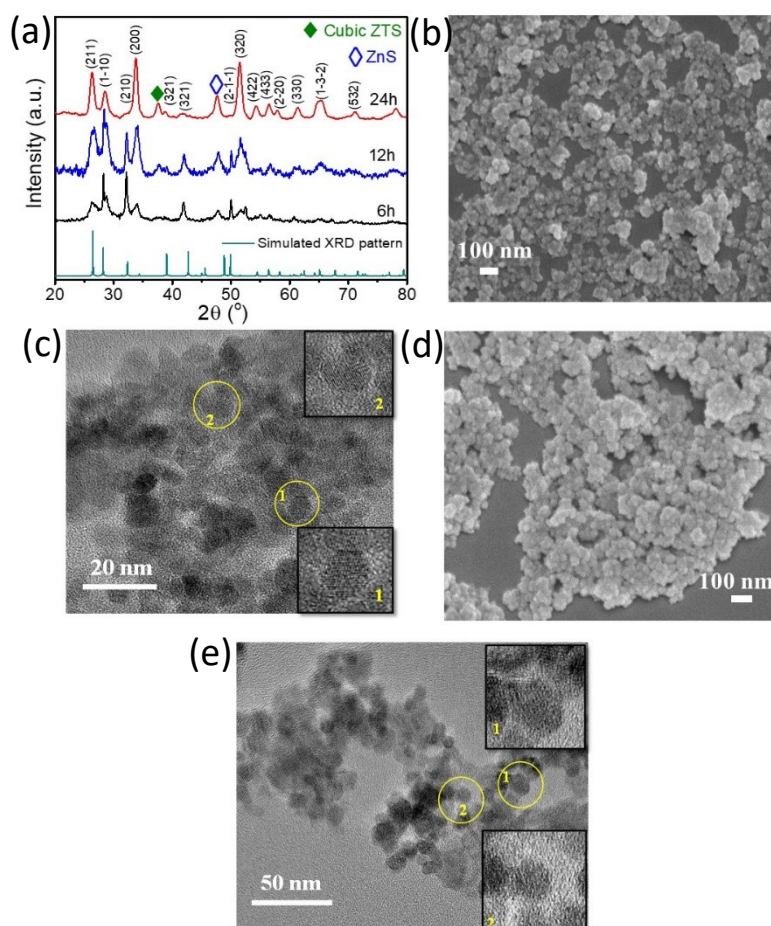

**Fig. S1** (a) Comparison of x-ray diffraction patterns of as-synthesized LN-ZTS NCs at different reaction time at 220° C. SEM and TEM images for (b) and (c) 12 h reaction, (d) and (e) for 6 h reaction for ZTS products.

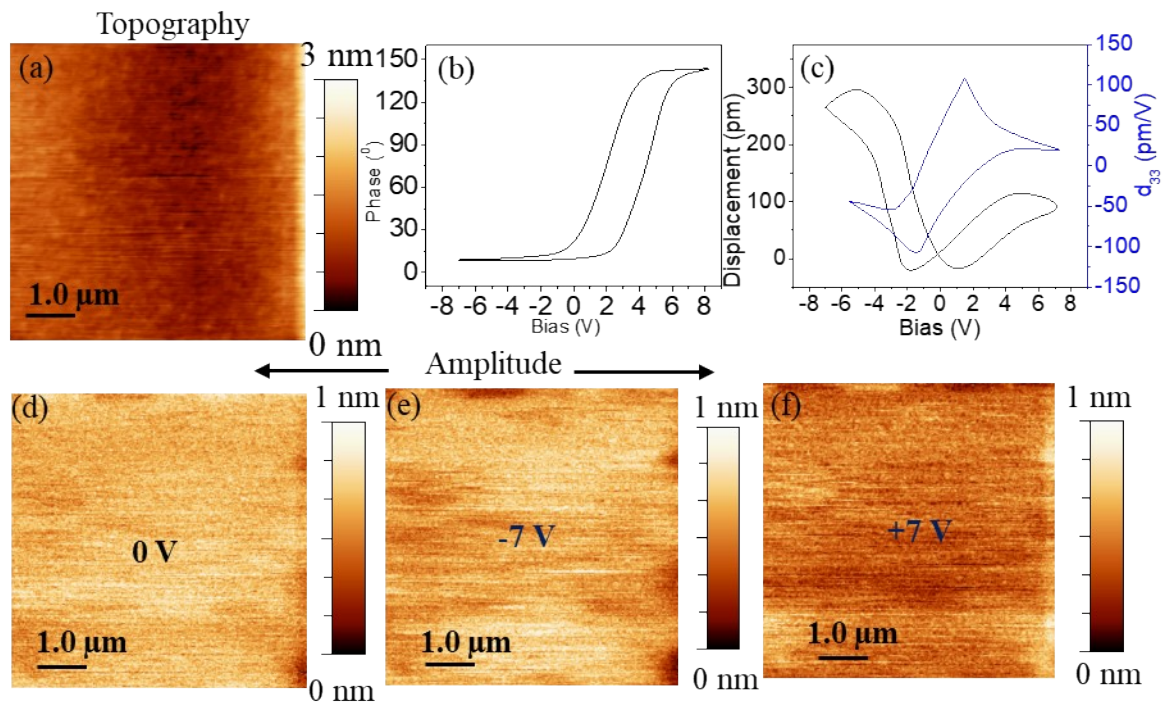

**Fig. S2:** (a) Topography image (b) Plot of the phase change of the LN-ZTS NCs film. (c) Butterfly loop and  $d_{33}$  plot. (d)-(e) amplitude images with the change of the bias voltage

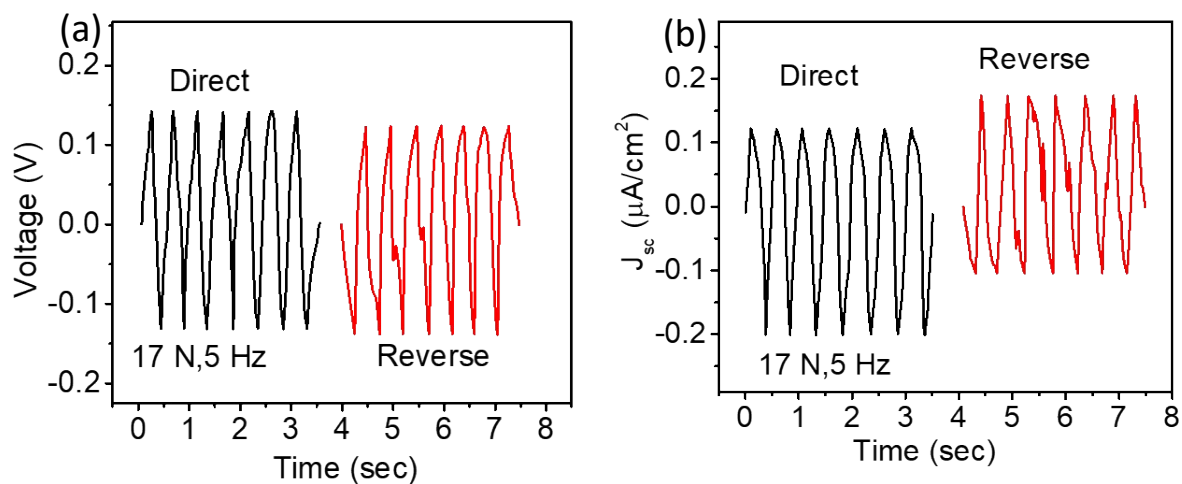

**Fig. S3** Variation of (a)  $V_{oc}$  and (b)  $J_{sc}$  for direct and reverse connection from the LN-ZTS pellet at 17 N and 5 Hz.

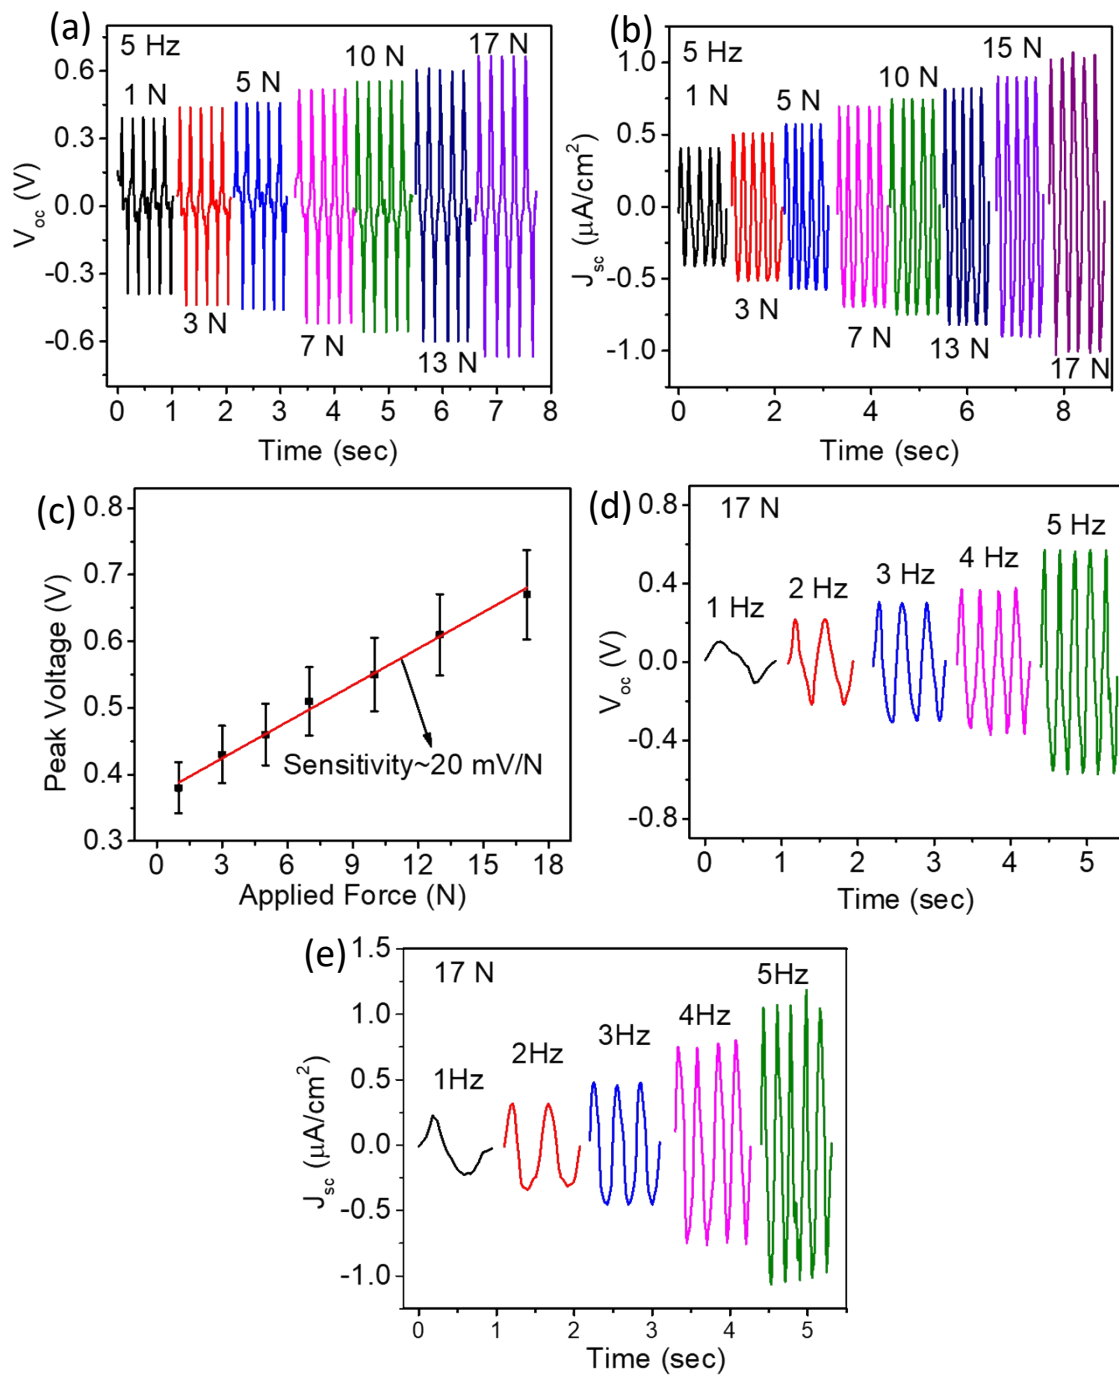

**Fig. S4** (a and b) Variation of  $V_{oc}$  and  $J_{sc}$  with time under different applied forces at 5 Hz, (c) piezoelectric sensitivity showing the change in the peak voltage with applied force. (d and e) Variation of  $V_{oc}$  and  $J_{sc}$  with the time at different frequencies under 17 N applied force.

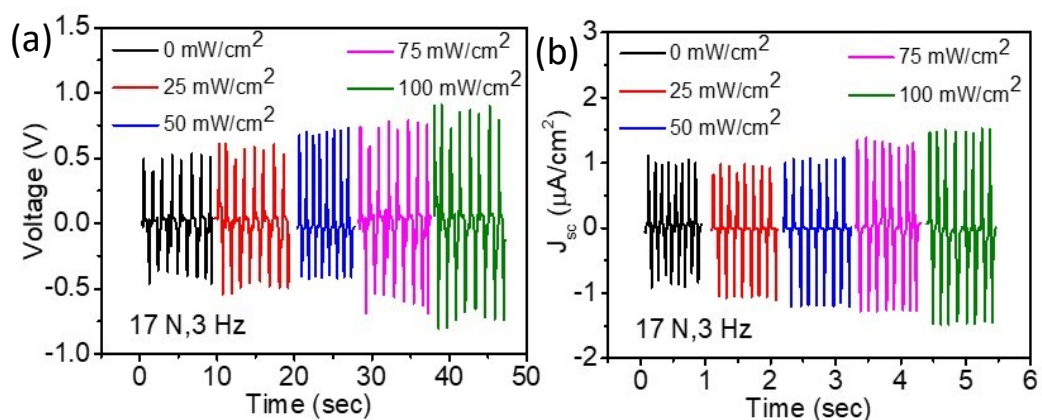

**Fig. S5:** (a) Changing of open circuit voltage and (b) short circuit current density with the changing of light intensity up to 100 mW/cm<sup>2</sup> at 17 N, 3Hz.

| Materials                              | $V_{oc}$     | $I_{sc}$                                  | $P_{max}$                                     | Applied force          | $d_{33}$       | Mechano sensitivity | Ref.             |
|----------------------------------------|--------------|-------------------------------------------|-----------------------------------------------|------------------------|----------------|---------------------|------------------|
| ZnS/PDMS/PANI                          | 35 V         | 77.7 nA                                   | 2.43 $\mu$ W/cm <sup>3</sup>                  | 13.6 Kpa               | .....<br>...   | .....               | [1]              |
| CdS nanowall arrays                    | 1.2 V        | 6 nA                                      | 6.13 nW/cm <sup>2</sup>                       | .....<br>(deformation) | .....          | 0.143 V/N           | [2]              |
| SnS <sub>2</sub> /PVDF                 | 60 ± 4 V     | 8 ± 0.4 nA                                | 87.11 $\mu$ W/cm <sup>2</sup>                 | 100 N                  | .....<br>..... | 4.83 M/Pa           | [3]              |
| MoS <sub>2</sub> /TOCN                 | 4.1 V        | 210 nA                                    | .....                                         | .....                  | 31 PC/N        | .....               | [4]              |
| WS <sub>2</sub> /PVDF                  | 116 V        | .....                                     | 48.5 $\mu$ W/cm <sup>2</sup>                  | .....                  |                | 105 KPa             | [5]              |
| <b>LN-ZnSnS<sub>3</sub> nanoflakes</b> | <b>0.7 V</b> | <b>1 <math>\mu</math>A/cm<sup>2</sup></b> | <b>0.025 <math>\mu</math>W/cm<sup>2</sup></b> | <b>17 N</b>            | <b>19 pm/V</b> | <b>20 mV/N</b>      | <b>This work</b> |

**Table S1.** Comparison of various parameters regarding piezoelectric energy harvesting of different sulphide-based nano/micro materials.

| <b>Materials</b>                            | <b>Measurement parameter</b>                                                                   | <b>Maxim-um Photov-oltage</b> | <b>Max. Photoc-urrent</b>    | <b>Power output</b>           | <b>d<sub>33</sub></b> | <b>Mechano-sensitivity</b> | <b>Ref.</b>      |
|---------------------------------------------|------------------------------------------------------------------------------------------------|-------------------------------|------------------------------|-------------------------------|-----------------------|----------------------------|------------------|
| ZnO/ZnS Core/Shell Nanowires                | 365 nm UV radiation<br>Power intensity 0.78 mW/cm <sup>2</sup><br>Compressive strain of -0.24% | .....                         | 350 μA/cm <sup>2</sup>       | .....                         | 3.8 pm/V              | .....                      | [6]              |
| Carbon-Fiber/ZnO-CdS Double-Shell Microwire | UV-VIS light (372-548 nm)<br>Compressive strain of -0.38%                                      | .....                         | 28 μA                        | .....                         | .....                 | .....                      | [7]              |
| Cu <sub>2</sub> S/CdS Coaxial Nanowire      | Compressive strain of -0.41%                                                                   | 0.29V                         | 0.3 nA                       | .....                         | .....                 | .....                      | [8]              |
| 2D MoS <sub>2</sub>                         | Intensity of 4.297 mW/cm <sup>2</sup> by a 633 nm laser,<br>Compressive strain of -0.38%       | .....                         | 220 nA                       | .....                         | .....                 | .....                      | [9]              |
| <b>LN-type ZnSnS<sub>3</sub> nanoflakes</b> | <b>100 mW/cm<sup>2</sup><br/>17N, 3 Hz</b>                                                     | <b>0.8 V</b>                  | <b>1.3 μA/cm<sup>2</sup></b> | <b>0.13 μW/cm<sup>2</sup></b> | <b>19.3 pm/V</b>      | <b>20 mV/N</b>             | <b>This work</b> |

**Table S2.** Comparison of various parameters of different piezophototronic sulphide-based nano/micro materials.

## References

1. A. Sultana, M. M. Alam, S. Garain, T. K. Sinha, T. R. Middy and D. Mandal, *ACS Appl. Mater. Interfaces*, 2015, **7**, 19091–19097.
2. W. Zhang, H. Yang, L. Li, S. Lin, P. Ji, C. Hu, D. Zhang and Y. Xi, *Nanotechnology*, **31**, 2020, 385401.
3. S. Maity, E. Kar and S. Sen, *ACS Appl. Mater. Interfaces* 2024, **16**, 68294–68305.
4. T. Wu, Y. Song, Z. Shi, D. Liu, S. Chen, C. Xiong and Q. Yang, *Nano Energy*, **80**, 2021, 105541.
5. D. Bhattacharya, S. Bayan, R. K. Mitra and S. K. Ray, *Nanoscale*, 2021, **13**, 15819-15829
6. S. Jeong, M. W. Kim, Y. R. Jo, T. Y. Kim, Y. C. Leem, S. W. Kim, B. J. Kim and S. J. Park, *ACS Appl. Mater. Interfaces*, 2018, **10**, 28736–28744.
7. F. Zhang, S. Niu, W. Guo, G. Zhu, Y. Liu, X. Zhang and Z. L. Wang, *ACS Nano*, 2013, **7**, 4537–4544.
8. C. Pan, S. Niu, Y. Ding, L. Dong, R. Yu, Y. Liu, G. Zhu, and Z. L. Wang *Nano Lett.*, 2012, **12**, 3302-3307.
9. W. Wu, L. Wang, R. Yu, Y. Liu, S-H Wei, J. Hone, Z. L. Wang, *Adv. Mater.*, 2016, **28**, 8463-8468.
